# Supplementary material
Source: PubMed Central journal article supplement (PMC7204427)
Supplement: NEJMc2009567_appendix.pdf [file NEJMc2009567_appendix.pdf]

## Supplementary Appendix

This appendix has been provided by the authors to give readers additional information about their work.

Supplement to: Haberman R, Axelrad J, Chen A, et al. Covid-19 in immune-mediated inflammatory diseases — case series from New York. *N Engl J Med*. DOI: [10.1056/NEJMc2009567](https://doi.org/10.1056/NEJMc2009567)

**COVID-19 in Immune-Mediated Inflammatory Diseases: Case Series From New York**  
**Supplementary Appendix**

**TABLE OF CONTENTS**

|                                                                                                                                                                                                                     |         |
|---------------------------------------------------------------------------------------------------------------------------------------------------------------------------------------------------------------------|---------|
| Table S1. Additional Baseline Characteristics of Patients with Confirmed COVID-19.                                                                                                                                  | Page 2  |
| Table S2. Medication Use in All Patients with Confirmed or Suspected COVID-19.                                                                                                                                      | Page 3  |
| Table S3. Medication Use in Patients with Confirmed COVID-19.                                                                                                                                                       | Page 4  |
| Table S4. Detailed Clinical Course of Patients Hospitalized with COVID-19.                                                                                                                                          | Page 5  |
| Table S5. Hospitalization Rate of Immune-Mediated Inflammatory Disease Patients with Confirmed or Highly Suspected COVID-19 by Age Group.                                                                           | Page 7  |
| Table S6. Medication Use in All Patients with a Primary Immune-Mediated Inflammatory Disease of Psoriasis and Psoriatic Arthritis with Confirmed or Suspected COVID-19.                                             | Page 8  |
| Table S7. Medication Use in All Patients with a Primary Immune-Mediated Inflammatory Disease of Rheumatoid Arthritis with Confirmed or Suspected COVID-19.                                                          | Page 9  |
| Table S8. Medication Use in All Patients with a Primary Immune-Mediated Inflammatory Disease of Inflammatory Bowel Disease (Crohn’s Disease and Ulcerative Colitis) with Confirmed or Suspected COVID-19 Infection. | Page 10 |

**Table S1.** Additional Baseline Characteristics of Patients with Confirmed COVID-19.♦

| <b>Characteristic</b>                     | <b>Total<br/>(n = 59)</b> | <b>Ambulatory<br/>(n = 45)</b> | <b>Hospitalized<br/>(n = 14)</b> |
|-------------------------------------------|---------------------------|--------------------------------|----------------------------------|
| Age—mean(range)                           | 47.7 (22-74)              | 47.0 (22-74)                   | 50.0 (25-73)                     |
| Female- n (%)                             | 32 (54)                   | 25 (55.6)                      | 7 (50.0)                         |
| <b>Primary IMID Diagnosis—n (%)</b>       |                           |                                |                                  |
| Psoriasis                                 | 7 (11.9)                  | 6 (13.3)                       | 1 (7.1)                          |
| Psoriatic Arthritis                       | 14 (23.7)                 | 11 (24.4)                      | 3 (21.4)                         |
| Rheumatoid Arthritis                      | 17 (28.8)                 | 11 (24.4)                      | 6 (42.9)                         |
| Ulcerative colitis                        | 10 (16.9)                 | 7 (15.6)                       | 3 (21.4)                         |
| Crohn’s disease                           | 12 (20.3)                 | 11 (24.4)                      | 1 (7.1)                          |
| Ankylosing Spondylitis                    | 6 (10.2)                  | 6 (13.3)                       | 0 (0.0)                          |
| <b>Body Mass Index—mean (SD)</b>          | 28.2 (6.5)                | 27.4 (5.7)                     | 30.8 (8.5)                       |
| <b>Comorbidities—n (%)</b>                |                           |                                |                                  |
| History of organ transplantation          | 1 (1.7)                   | 1 (2.2)                        | 0 (0.0)                          |
| Current malignancy                        | 0 (0.0)                   | 0 (0.0)                        | 0 (0.0)                          |
| Congestive heart failure                  | 1 (1.7)                   | 1 (2.2)                        | 0 (0.0)                          |
| Hypertension                              | 9 (15.3)                  | 4 (8.9)                        | 5 (35.7)                         |
| Diabetes                                  | 4 (6.8)                   | 2 (4.4)                        | 2 (14.3)                         |
| Chronic obstructive pulmonary disease     | 2 (3.4)                   | 1 (2.2)                        | 1 (7.1)                          |
| Asthma                                    | 9 (15.3)                  | 9 (20.0)                       | 0 (0.0)                          |
| Currently pregnant                        | 2 (3.4)                   | 1 (2.2)                        | 1 (7.1)                          |
| <b>Chronic Medications—n(%)</b>           |                           |                                |                                  |
| ACE inhibitor/ARB                         | 10 (16.9)                 | 5 (11.1)                       | 5 (35.7)                         |
| Any medication for primary IMID diagnosis | 53 (89.8)                 | 40 (88.9)                      | 13 (92.9)                        |
| Methotrexate                              | 14 (23.7)                 | 8 (17.8)                       | 6 (42.9)                         |
| Hydroxychloroquine                        | 7 (11.9)                  | 4 (8.9)                        | 3 (21.4)                         |
| Oral glucocorticoids                      | 7 (11.9)                  | 3 (6.7)                        | 4 (28.6)                         |
| Any biologic or JAK inhibitor             | 41 (69.5)                 | 34 (75.6)                      | 7 (50.0)                         |
| TNF inhibitor                             | 27 (45.8)                 | 24 (53.3)                      | 3 (21.4)                         |
| IL-17 blocker                             | 5 (8.5)                   | 4 (8.9)                        | 1 (7.1)                          |
| IL-12/23 blocker                          | 2 (3.4)                   | 2 (4.4)                        | 0 (0.0)                          |
| IL-23 blocker                             | 1 (1.7)                   | 1 (2.2)                        | 0 (0.0)                          |
| JAK inhibitor                             | 4 (6.8)                   | 3 (6.7)                        | 1 (7.1)                          |
| <b>COVID-19 Symptoms—n (%)</b>            |                           |                                |                                  |
| Fever                                     | 53 (89.8)                 | 41 (91.1)                      | 12 (85.7)                        |
| Cough                                     | 27 (45.8)                 | 15 (33.3)                      | 12 (85.7)                        |
| Shortness of breath                       | 27 (45.8)                 | 14 (31.1)                      | 13 (92.9)                        |
| Rhinorrhea                                | 4 (6.8)                   | 3 (6.7)                        | 1 (7.1)                          |
| Sore throat                               | 7 (11.9)                  | 7 (15.6)                       |                                  |
| Diarrhea                                  | 10 (16.9)                 | 6 (13.3)                       | 4 (28.6)                         |
| Anosmia                                   | 8 (13.6)                  | 4 (8.9)                        | 4 (28.6)                         |
| Ageusia                                   | 8 (13.6)                  | 4 (8.9)                        | 4 (28.6)                         |

♦IMID denotes immune mediated inflammatory disease, ACE angiotensin-converting enzyme, ARB angiotensin II receptor blocker, JAK janus kinase, TNF tumor necrosis factor, and IL interleukin.

**Table S2. Medication Use in All Patients with Confirmed or Suspected COVID-19.♦**

| <b>Medication – n(%)</b>                                 | <b>Total<br/>(n = 86)</b> | <b>Ambulatory<br/>(n = 72)</b> | <b>Hospitalized<br/>(n = 14)</b> | <b>Odds ratio<br/>(adjusted*)</b> | <b>95% Confidence<br/>Interval<br/>(adjusted*)</b> |
|----------------------------------------------------------|---------------------------|--------------------------------|----------------------------------|-----------------------------------|----------------------------------------------------|
| <b>ACE inhibitor/ARB</b>                                 | 13 (15.1)                 | 8 (11.1)                       | 5 (35.7)                         | 1.01                              | [0.75, 1.34]                                       |
| <b>Any medication for<br/>primary IMID<br/>diagnosis</b> | 75 (87.2)                 | 62 (86.1)                      | 13 (92.9)                        | 1.13                              | [0.90, 1.41]                                       |
| <b>Any biologic or JAKi</b>                              | 62 (72.1)                 | 55 (76.4)                      | 7 (50.0)                         | 0.85                              | [0.71, 1.02]                                       |
| <b>TNF inhibitor</b>                                     | 38 (44.2)                 | 35 (48.6)                      | 3 (21.4)                         | 0.90                              | [0.76, 1.06]                                       |
| <b>IL-17 blocker</b>                                     | 6 (7.0)                   | 5 (6.9)                        | 1 (7.1)                          | 0.97                              | [0.72, 1.31]                                       |
| <b>IL-23 blocker</b>                                     | 3 (3.5)                   | 3 (4.2)                        | 0 (0.0)                          | 0.75                              | [0.50, 1.13]                                       |
| <b>IL-12/23 blocker</b>                                  | 6 (7.0)                   | 6 (8.3)                        | 0 (0.0)                          | 0.86                              | [0.65, 1.15]                                       |
| <b>JAKi</b>                                              | 6 (7.0)                   | 5 (6.9)                        | 1 (7.1)                          | 1.05                              | [0.78, 1.41]                                       |
| <b>Small molecules</b>                                   |                           |                                |                                  |                                   |                                                    |
| Apremilast                                               | 1 (1.2)                   | 1 (1.4)                        | 0 (0.0)                          | 0.79                              | [0.39, 1.59]                                       |
| Azathioprine                                             | 1 (1.2)                   | 1 (1.4)                        | 0 (0.0)                          | 0.86                              | [0.43, 1.69]                                       |
| Hydroxychloroquine                                       | 8 (9.3)                   | 5 (6.9)                        | 3 (21.4)                         | 1.36                              | [1.06, 1.74]                                       |
| Leflunomide                                              | 1 (1.2)                   | 1 (1.4)                        | 0 (0.0)                          | 0.57                              | [0.28, 1.15]                                       |
| Mesalamine                                               | 7 (8.1)                   | 5 (6.9)                        | 2 (14.3)                         | 1.33                              | [0.98, 1.79]                                       |
| Methotrexate                                             | 17 (19.8)                 | 11 (15.3)                      | 6 (42.9)                         | 1.29                              | [1.04, 1.58]                                       |
| NSAIDs                                                   | 3 (3.5)                   | 3 (4.2)                        | 0 (0.0)                          | 0.97                              | [0.65, 1.45]                                       |
| Prednisone                                               | 8 (9.3)                   | 4 (5.6)                        | 4 (28.6)                         | 1.38                              | [1.07, 1.77]                                       |
| Sulfasalazine                                            | 1 (1.2)                   | 1 (1.4)                        | 0 (0.0)                          | 0.95                              | [0.47, 1.93]                                       |
| <b>Biologics</b>                                         |                           |                                |                                  |                                   |                                                    |
| Adalimumab                                               | 17 (19.8)                 | 16 (22.2)                      | 1 (7.1)                          | 0.92                              | [0.76, 1.12]                                       |
| Certolizumab                                             | 3 (3.5)                   | 3 (4.2)                        | 0 (0.0)                          | 0.89                              | [0.60, 1.32]                                       |
| Etanercept                                               | 6 (7.0)                   | 5 (6.9)                        | 1 (7.1)                          | 1.00                              | [0.74, 1.34]                                       |
| Guselkumab                                               | 3 (3.5)                   | 3 (4.2)                        | 0 (0.0)                          | 0.75                              | [0.50, 1.13]                                       |
| Infliximab                                               | 12 (14.0)                 | 11 (15.3)                      | 1 (7.1)                          | 0.96                              | [0.76, 1.22]                                       |
| Ixekizumab                                               | 1 (1.2)                   | 1 (1.4)                        | 0 (0.0)                          | 0.93                              | [0.47, 1.84]                                       |
| Rituximab                                                | 1 (1.2)                   | 0 (0.0)                        | 1 (7.1)                          | 1.73                              | [0.79, 3.83]                                       |
| Secukinumab                                              | 5 (5.8)                   | 4 (5.6)                        | 1 (7.1)                          | 0.98                              | [0.71, 1.36]                                       |
| Tocilizumab                                              | 1 (1.2)                   | 0 (0.0)                        | 1 (7.1)                          | 2.32                              | [1.20, 4.48]                                       |
| Tofacitinib                                              | 6 (7.0)                   | 5 (6.9)                        | 1 (7.1)                          | 1.05                              | [0.78, 1.41]                                       |
| Ustekinumab                                              | 6 (7.0)                   | 6 (8.3)                        | 0 (0.0)                          | 0.86                              | [0.65, 1.15]                                       |
| Vedolixumab                                              | 1 (1.2)                   | 1 (1.4)                        | 0 (0.0)                          | 0.94                              | [0.42, 2.11]                                       |

♦IMID denotes immune mediated inflammatory disease, ACE angiotensin-converting enzyme, ARB angiotensin II receptor blocker, JAKi janus kinase inhibitor, TNF tumor necrosis factor, and IL interleukin.

\*OR and 95% CI for hospitalization based on chronic medication use, adjusted for age, sex, BMI, and selected comorbidities (history of organ transplantation, congestive heart failure, hypertension, diabetes mellitus, COPD, and pregnancy)

**Table S3.** Medication Use in Patients with Confirmed COVID-19.♦

| Medication—n(%)                                  | Total<br>(n = 59) | Ambulatory<br>(n = 45) | Hospitalized<br>(n = 14) | Odds ratio<br>(adjusted*) | 95% Confidence<br>Interval<br>(adjusted*) |
|--------------------------------------------------|-------------------|------------------------|--------------------------|---------------------------|-------------------------------------------|
| <b>ACE inhibitor/ARB</b>                         | 10 (16.9)         | 5 (11.1)               | 5 (35.7)                 | 0.88                      | [0.56, 1.41]                              |
| <b>Any medication for primary IMID diagnosis</b> | 53 (89.8)         | 40 (88.9)              | 13 (92.9)                | 1.22                      | [0.85, 1.77]                              |
| <b>Any biologic or JAKi</b>                      | 41 (69.5)         | 34 (75.6)              | 7 (50.0)                 | 0.79                      | [0.59, 1.05]                              |
| <b>TNF inhibitor</b>                             | 27 (45.8)         | 24 (53.3)              | 3 (21.4)                 | 0.84                      | [0.64, 1.09]                              |
| <b>IL-17 blocker</b>                             | 5 (8.5)           | 4 (8.9)                | 1 (7.1)                  | 0.89                      | [0.61, 1.31]                              |
| <b>IL-23 blocker</b>                             | 1 (1.7)           | 1 (2.2)                | 0 (0.0)                  | 0.79                      | [0.36, 1.76]                              |
| <b>IL-12/23 blocker</b>                          | 2 (3.4)           | 2 (4.4)                | 0 (0.0)                  | 0.69                      | [0.38, 1.24]                              |
| <b>JAKi</b>                                      | 4 (6.8)           | 3 (6.7)                | 1 (7.1)                  | 1.06                      | [0.68, 1.65]                              |
| <b>Small molecules</b>                           |                   |                        |                          |                           |                                           |
| Apremilast                                       | 1 (1.7)           | 1 (2.2)                | 0 (0.0)                  | 0.85                      | [0.36, 1.99]                              |
| Azathioprine                                     | 1 (1.7)           | 1 (2.2)                | 0 (0.0)                  | 0.81                      | [0.36, 1.82]                              |
| Hydroxychloroquine                               | 7 (11.9)          | 4 (8.9)                | 3 (21.4)                 | 1.43                      | [1.04, 1.97]                              |
| Leflunomide                                      | 1 (1.7)           | 1 (2.2)                | 0 (0.0)                  | 0.50                      | [0.22, 1.16]                              |
| Mesalamine                                       | 5 (8.5)           | 3 (6.7)                | 2 (14.3)                 | 1.47                      | [0.93, 2.31]                              |
| Methotrexate                                     | 14 (23.7)         | 8 (17.8)               | 6 (42.9)                 | 1.37                      | [1.06, 1.78]                              |
| NSAIDs                                           | 2 (3.4)           | 2 (4.4)                | 0 (0.0)                  | 0.96                      | [0.53, 1.71]                              |
| Prednisone                                       | 7 (11.9)          | 3 (6.7)                | 4 (28.6)                 | 1.40                      | [1.01, 1.93]                              |
| Sulfasalazine                                    | 1 (1.7)           | 1 (2.2)                | 0 (0.0)                  | 0.86                      | [0.37, 2.01]                              |
| <b>Biologics</b>                                 |                   |                        |                          |                           |                                           |
| Adalimumab                                       | 11 (18.6)         | 10 (22.2)              | 1 (7.1)                  | 0.93                      | [0.70, 1.22]                              |
| Certolizumab                                     | 2 (3.4)           | 2 (4.4)                | 0 (0.0)                  | 0.86                      | [0.48, 1.54]                              |
| Etanercept                                       | 4 (6.8)           | 3 (6.7)                | 1 (7.1)                  | 1.01                      | [0.66, 1.57]                              |
| Guselkumab                                       | 1 (1.7)           | 1 (2.2)                | 0 (0.0)                  | 0.79                      | [0.36, 1.76]                              |
| Infliximab                                       | 10 (16.9)         | 9 (20.0)               | 1 (7.1)                  | 0.88                      | [0.62, 1.23]                              |
| Ixekizumab                                       | 1 (1.7)           | 1 (2.2)                | 0 (0.0)                  | 0.92                      | [0.41, 2.07]                              |
| Rituximab                                        | 1 (1.7)           | 0 (0.0)                | 1 (7.1)                  | 1.41                      | [0.52, 3.86]                              |
| Secukinumab                                      | 4 (6.8)           | 3 (6.7)                | 1 (7.1)                  | 0.88                      | [0.56, 1.38]                              |
| Tocilizumab                                      | 1 (1.7)           | 0 (0.0)                | 1 (7.1)                  | 2.23                      | [1.03, 4.86]                              |
| Tofacitinib                                      | 4 (6.8)           | 3 (6.7)                | 1 (7.1)                  | 1.06                      | [0.68, 1.65]                              |
| Ustekinumab                                      | 2 (3.4)           | 2 (4.4)                | 0 (0.0)                  | 0.69                      | [0.38, 1.24]                              |
| Vedolixumab                                      | 0 (0.0)           | 0 (0.0)                | 0 (0.0)                  | --                        | --                                        |

♦IMID denotes immune mediated inflammatory disease, ACE angiotensin-converting enzyme, ARB angiotensin II receptor blocker, JAKi janus kinase inhibitor, TNF tumor necrosis factor, and IL interleukin.

\*OR and 95% CI for hospitalization based on chronic medication use, adjusted for age, sex, BMI, and selected comorbidities (history of organ transplantation, congestive heart failure, hypertension, diabetes mellitus, COPD, and pregnancy)

**Table S4.** Detailed Clinical Course of Patients Hospitalized with COVID-19.♦

|          | Age | Sex    | Disease/<br>Severity | Medications                                                 | Comorbidities                                                     | Symptoms                                                                                       | Imaging<br>Findings                                                                       | Hospital Outcomes                                                                                                                                                                                                                                                    |
|----------|-----|--------|----------------------|-------------------------------------------------------------|-------------------------------------------------------------------|------------------------------------------------------------------------------------------------|-------------------------------------------------------------------------------------------|----------------------------------------------------------------------------------------------------------------------------------------------------------------------------------------------------------------------------------------------------------------------|
| <b>A</b> | 73  | Male   | PsA<br>Moderate      | Tofacitinib                                                 | Diabetes<br>BMI> 40                                               | Fever<br>>100.4<br>Cough<br>Shortness of<br>breath                                             | CXR:<br>Diffuse patchy<br>opacities                                                       | Regular room<br>Needed supplemental O2 with nasal<br>cannula<br>Given hydroxychloroquine/<br>azithromycin<br>Discharged at day 14                                                                                                                                    |
| <b>B</b> | 51  | Male   | PsA<br>Mild          | Secukinumab                                                 | Hypertension<br>BMI> 35                                           | Fever > 102<br>Cough<br>Shortness of<br>breath                                                 | CXR:<br>Prominence of<br>bronchovascular<br>markings                                      | Regular room<br>Needed supplemental O2 with nasal<br>cannula<br>Given hydroxychloroquine/<br>azithromycin<br>Discharged at day 3                                                                                                                                     |
| <b>C</b> | 67  | Male   | RA<br>Mild           | Methotrexate 20 mg<br>Hydroxychloroquine<br>Prednisone 5 mg |                                                                   | Fever> 103<br>Cough<br>Shortness of<br>breath                                                  | CXR:<br>Diffuse patchy<br>opacities<br>Prominent<br>interstitial<br>markings              | Regular room<br>Needed supplemental O2 with nasal<br>cannula<br>Continued home<br>hydroxychloroquine/given<br>azithromycin<br>Discharged at day 2                                                                                                                    |
| <b>D</b> | 54  | Female | RA<br>Remission      | Rituximab<br>Methotrexate 10 mg<br>Prednisone 5mg           | Hypertension<br>Diabetes<br>BMI> 40                               | Fever >102<br>Cough<br>Shortness of<br>breath<br>Diarrhea<br>Loss of<br>smell<br>Loss of taste | CXR:<br>Bilateral lower<br>lung opacities                                                 | Regular room<br>Needed supplemental O2 with non-<br>rebreather mask<br>Given<br>hydroxychloroquine/azithromycin/<br>lopinavir-ritonavir /tocilizumab<br>Discharged at day 10                                                                                         |
| <b>E</b> | 47  | Female | RA<br>Remission      | Tocilizumab<br>Methotrexate 15 mg<br>Hydroxychloroquine     | BMI > 30                                                          | Fever >102<br>Cough<br>Shortness of<br>breath<br>Loss of<br>smell<br>Loss of taste             | CXR:<br>Bilateral lower<br>lung opacities.                                                | Regular room<br>Needed supplemental O2 with nasal<br>cannula<br>Continued home<br>hydroxychloroquine/given<br>azithromycin<br>Discharged at day 6                                                                                                                    |
| <b>F</b> | 62  | Male   | PsA<br>Mild          | Methotrexate 20 mg                                          | Hypertension<br>BMI >30                                           | Fever >103<br>Shortness of<br>breath                                                           | CXR:<br>Diffuse patchy<br>opacities                                                       | ICU level care<br>ARDS requiring ventilator assistance<br>Elevated IL-6 (9 pg/ml), CRP (315.7<br>mg/L), D-dimer (2,828 ng/ml),<br>ferritin (3,583 ng/ml) levels<br>Given hydroxychloroquine<br>/azithromycin/<br>lopinavir-ritonavir<br>Currently on hospital day 24 |
| <b>G</b> | 57  | Female | RA<br>Moderate       | Prednisone 15 mg<br>Methotrexate 20 mg                      |                                                                   | Fever> 102<br>Cough<br>Shortness of<br>breath<br>Diarrhea                                      | CXR:<br>Bilateral lower<br>lung opacities                                                 | Regular room<br>No supplemental oxygen needed<br>Given hydroxychloroquine/<br>azithromycin<br>Discharged at day 10                                                                                                                                                   |
| <b>H</b> | 59  | Male   | Psoriasis<br>Severe  | UV light therapy                                            | Hypertension<br>BMI >40<br>History of heart<br>disease (stent x2) | Cough<br>Shortness of<br>breath                                                                |                                                                                           | Died on arrival to the ED                                                                                                                                                                                                                                            |
| <b>I</b> | 60  | Female | RA<br>Moderate       | Etanercept                                                  | Hypertension<br>COPD                                              | Fever ><br>100.4<br>Cough<br>Shortness of<br>breath<br>Diarrhea                                | CXR:<br>Diffuse patchy<br>opacities<br>Coarsened<br>pulmonary<br>markings                 | Regular room<br>Needed supplemental O2 with nasal<br>cannula<br>Given hydroxychloroquine/<br>azithromycin<br>Discharged at day 7                                                                                                                                     |
| <b>J</b> | 52  | Female | RA<br>Moderate       | Hydroxychloroquine<br>Methotrexate 20 mg<br>Prednisone 10mg | Hypertension<br>BMI >=30                                          | Fever >101<br>Cough<br>Shortness of<br>breath<br>Diarrhea                                      | CXR:<br>Bilateral lower<br>lung patchy<br>opacities<br>Coarsened<br>pulmonary<br>markings | Regular room<br>Needed supplemental O2 with nasal<br>cannula<br>Continued home<br>hydroxychloroquine/given<br>azithromycin/lopinavir-ritonavir<br>Discharged at day 7                                                                                                |
| <b>K</b> | 34  | Male   | UC<br>Remission      | Infliximab                                                  | None                                                              | Fever > 101<br>Cough<br>Runny Nose                                                             | CXR:<br>Coarsened<br>pulmonary<br>markings<br>No definite<br>consolidation                | Regular room<br>No supplemental O2 need<br>Not treated medically<br>Discharged within 24 hours                                                                                                                                                                       |
| <b>L</b> | 26  | Female | UC<br>Remission      | Mesalamine                                                  | None                                                              | Fever > 99<br>Cough                                                                            | Not available                                                                             | Regular room<br>No supplemental O2 needed<br>Not treated medically                                                                                                                                                                                                   |

|          |    |        |             |                  |                  |                                             |                                   |                                                                                                                                                                                                          |
|----------|----|--------|-------------|------------------|------------------|---------------------------------------------|-----------------------------------|----------------------------------------------------------------------------------------------------------------------------------------------------------------------------------------------------------|
|          |    |        |             |                  |                  | Shortness of breath                         |                                   | Discharged within 24 hours                                                                                                                                                                               |
| <b>M</b> | 25 | Male   | CD Moderate | Adalimumab       | None             | Fever > 102<br>Cough<br>Shortness of breath | Not available                     | Regular room<br>No supplemental O2 needed<br>Not treated medically<br>Discharged at day 2                                                                                                                |
| <b>N</b> | 26 | Female | UC Severe   | Prednisone 20 mg | 7 weeks pregnant | Shortness of breath                         | CXR:<br>No definite consolidation | Admitted for UC flare<br>Regular room<br>No supplementary O2 needed<br>Given hydroxychloroquine/<br>azithromycin<br>UC treated with Cyclosporine and tapering prednisone<br>Currently on hospital day 11 |

♦PsA denotes psoriatic arthritis, RA rheumatoid arthritis, UC ulcerative colitis, CD Crohn's disease, CXR chest X-ray, BMI body mass index, COPD chronic obstructive pulmonary disease, O2 oxygen, ICU intensive care unit, ARDS acute respiratory distress syndrome, IL-6 interleukin-6, and CRP c-reactive protein.

**Table S5.** Hospitalization Rate of Immune-Mediated Inflammatory Disease Patients with Confirmed or Highly Suspected COVID-19 by Age Group.♦

| <b>Age group</b> | <b>IMID total cases—n</b> | <b>IMID hospitalized cases – n (%)</b> | <b>NYC Total Cases<sup>1</sup>—n</b> | <b>NYC Total Hospitalized Cases<sup>1</sup>—n (%)</b> |
|------------------|---------------------------|----------------------------------------|--------------------------------------|-------------------------------------------------------|
| <b>18 to 44</b>  | 42                        | 4 (10)                                 | 49,887                               | 5,105 (10)                                            |
| <b>45 to 65</b>  | 34                        | 8 (24)                                 | 49,383                               | 12,675 (26)                                           |
| <b>65 to 74</b>  | 10                        | 2 (20)                                 | 17,072                               | 8,127 (48)                                            |

<sup>1</sup>NYC Health. Coronavirus Disease 2019 Daily Data Summary: NYC COVID-19 Hospitalizations Among Confirmed Cases.

<https://www1.nyc.gov/assets/doh/downloads/pdf/imm/covid-19-daily-data-summary-hospitalizations-04212020-1.pdf> (Accessed April 21, 2020)

♦IMID denotes immune mediated inflammatory disease, and NYC New York City.



**Table S6.** Medication Use in All Patients with a Primary Immune-Mediated Inflammatory Disease of Psoriasis and Psoriatic Arthritis with Confirmed or Suspected COVID-19.♦

| <b>Medication – n(%)</b>                         | <b>Total<br/>(n = 25)</b> | <b>Ambulatory<br/>(n = 21)</b> | <b>Hospitalized<br/>(n = 4)</b> |
|--------------------------------------------------|---------------------------|--------------------------------|---------------------------------|
| <b>ACE inhibitor/ARB</b>                         | 6 (24.0)                  | 4 (19.0)                       | 2 (50.0)                        |
| <b>Any medication for primary IMID diagnosis</b> | 22 (88.0)                 | 19 (90.5)                      | 3 (75.0)                        |
| <b>Any biologic or JAK inhibitors</b>            | 20 (80.0)                 | 17 (80.0)                      | 2 (50.0)                        |
| <b>TNF inhibitor</b>                             | 7 (28.0)                  | 7 (33.3)                       | 0 (0.0)                         |
| <b>IL-17 blocker</b>                             | 6 (24.0)                  | 5 (23.8)                       | 1 (25.0)                        |
| <b>IL-23 blocker</b>                             | 3 (12.0)                  | 3 (14.3)                       | 0 (0.0)                         |
| <b>IL-12/23 blocker</b>                          | 2 (8.0)                   | 2 (9.5)                        | 0 (0.0)                         |
| <b>JAK inhibitor</b>                             | 2 (8.0)                   | 1 (4.8)                        | 1 (25.0)                        |
| <b>Small molecules</b>                           |                           |                                |                                 |
| Apremilast                                       | 1 (4.0)                   | 1 (4.8)                        | 0 (0.0)                         |
| Hydroxychloroquine                               | 1 (4.0)                   | 1 (4.8)                        | 0 (0.0)                         |
| Methotrexate                                     | 4 (16.0)                  | 3 (14.3)                       | 1 (25.0)                        |
| NSAIDs                                           | 2 (8.0)                   | 2 (9.5)                        | 0 (0.0)                         |
| Prednisone                                       | 2 (8.0)                   | 2 (9.5)                        | 0 (0.0)                         |
| <b>Biologics</b>                                 |                           |                                |                                 |
| Adalimumab                                       | 4 (16.0)                  | 4 (19.0)                       | 0 (0.0)                         |
| Certolizumab                                     | 2 (8.0)                   | 2 (9.5)                        | 0 (0.0)                         |
| Etanercept                                       | 1 (4.0)                   | 1 (4.8)                        | 0 (0.0)                         |
| Guselkumab                                       | 3 (12.0)                  | 3 (14.3)                       | 0 (0.0)                         |
| Ixekizumab                                       | 1 (4.0)                   | 1 (4.8)                        | 0 (0.0)                         |
| Secukinumab                                      | 5 (20.0)                  | 4 (19.0)                       | 1 (25.0)                        |
| Tofacitinib                                      | 2 (8.0)                   | 1 (4.8)                        | 1 (25.0)                        |
| Ustekinumab                                      | 2 (8.0)                   | 2 (9.5)                        | 0 (0.0)                         |

♦IMID denotes immune mediated inflammatory disease, ACE angiotensin-converting enzyme, ARB angiotensin II receptor blocker, JAK janus kinase, TNF tumor necrosis factor, and IL interleukin.

**Table S7.** Medication Use in All Patients with a Primary Immune-Mediated Inflammatory Disease of Rheumatoid Arthritis with Confirmed or Suspected COVID-19.♦

| <b>Medication – n(%)</b>                         | <b>Total<br/>(n =20)</b> | <b>Ambulatory<br/>(n =14)</b> | <b>Hospitalized<br/>(n =6)</b> |
|--------------------------------------------------|--------------------------|-------------------------------|--------------------------------|
| <b>ACE inhibitor/ARB</b>                         | 5 (25.0)                 | 2 (14.3)                      | 3 (50.0)                       |
| <b>Any medication for primary IMID diagnosis</b> | 20 (100.0)               | 14 (100.0)                    | 6 (100.0)                      |
| <b>Any biologic or JAK inhibitor</b>             | 16 (80.0)                | 13 (90.3)                     | 3 (50.0)                       |
| <b>TNF inhibitor</b>                             | 9 (45.0)                 | 8 (57.1)                      | 1 (16.7)                       |
| <b>IL-17 blocker</b>                             | 1 (5.0)                  | 1 (7.1)                       | 0 (0.0)                        |
| <b>JAK inhibitor</b>                             | 3 (15.0)                 | 3 (21.4)                      | 0 (0.0)                        |
| <b>Small molecules</b>                           |                          |                               |                                |
| Azathioprine                                     | 1 (5.0)                  | 1 (7.1)                       | 0 (0.0)                        |
| Hydroxychloroquine                               | 5 (25.0)                 | 2 (14.3)                      | 3 (50.0)                       |
| Leflunomide                                      | 1 (5.0)                  | 1 (7.1)                       | 0 (0.0)                        |
| Methotrexate                                     | 12 (60.0)                | 7 (50.0)                      | 5 (83.3)                       |
| NSAIDs                                           | 1 (5.0)                  | 1 (7.1)                       | 0 (0.0)                        |
| Prednisone                                       | 5 (25.0)                 | 1 (7.1)                       | 4 (66.7)                       |
| Sulfasalazine                                    | 1 (5.0)                  | 1 (7.1)                       | 0 (0.0)                        |
| <b>Biologics</b>                                 |                          |                               |                                |
| Adalimumab                                       | 2 (10.0)                 | 2 (14.3)                      | 0 (0.0)                        |
| Certolizumab                                     | 1 (5.0)                  | 1 (7.1)                       | 0 (0.0)                        |
| Etanercept                                       | 5 (25.0)                 | 4 (28.6)                      | 1 (16.7)                       |
| Infliximab                                       | 1 (5.0)                  | 1 (7.1)                       | 0 (0.0)                        |
| Rituximab                                        | 1 (5.0)                  | 0 (0.0)                       | 1 (16.7)                       |
| Secukinumab                                      | 1 (5.0)                  | 1 (7.1)                       | 0 (0.0)                        |
| Tocilizumab                                      | 1 (5.0)                  | 0 (0.0)                       | 1 (16.7)                       |
| Tofacitinib                                      | 3 (15.0)                 | 3 (21.4)                      | 0 (0.0)                        |

♦IMID denotes immune mediated inflammatory disease, ACE angiotensin-converting enzyme, ARB angiotensin II receptor blocker, JAK janus kinase, TNF tumor necrosis factor, and IL interleukin.

**Table S8.** Medication Use in All Patients with a Primary Immune-Mediated Inflammatory Disease of Inflammatory Bowel Disease (Crohn’s Disease and Ulcerative Colitis) with Confirmed or Suspected COVID-19 Infection.♦

| <b>Medication – n(%)</b>                         | <b>Total<br/>(n = 37)</b> | <b>Ambulatory<br/>(n = 33)</b> | <b>Hospitalized<br/>(n = 4)</b> |
|--------------------------------------------------|---------------------------|--------------------------------|---------------------------------|
| <b>ACE inhibitor/ARB</b>                         | 2 (5.4)                   | 2 (6.1)                        | 0 (0.0)                         |
| <b>Any medication for primary IMID diagnosis</b> | 30 (81.1)                 | 26 (78.8)                      | 4 (100.0)                       |
| <b>Any biologic or JAK inhibitor</b>             | 26 (70.2)                 | 23 (69.7)                      | 2 (50.0)                        |
| <b>TNF inhibitor</b>                             | 19 (51.4)                 | 17 (51.5)                      | 2 (50.0)                        |
| <b>IL-12/23 blocker</b>                          | 4 (10.8)                  | 4 (12.1)                       | 0 (0.0)                         |
| <b>Small molecules</b>                           |                           |                                |                                 |
| Hydroxychloroquine                               | 1 (2.7)                   | 1 (3.0)                        | 0 (0.0)                         |
| Mesalamine                                       | 7 (18.9)                  | 5 (15.2)                       | 2 (50.0)                        |
| Methotrexate                                     | 1 (2.7)                   | 1 (3.0)                        | 0 (0.0)                         |
| Prednisone                                       | 1 (2.7)                   | 1 (3.0)                        | 0 (0.0)                         |
| <b>Biologics</b>                                 |                           |                                |                                 |
| Adalimumab                                       | 8 (21.6)                  | 7 (21.2)                       | 1 (25.0)                        |
| Infliximab                                       | 11 (29.7)                 | 10 (30.3)                      | 1 (25.0)                        |
| Ustekinumab                                      | 4 (10.8)                  | 4 (12.1)                       | 0 (0.0)                         |
| Vedolixumab                                      | 1 (2.7)                   | 1 (3.0)                        | 0 (0.0)                         |

♦IMID denotes immune mediated inflammatory disease, ACE angiotensin-converting enzyme, ARB angiotensin II receptor blocker, JAK janus kinase, TNF tumor necrosis factor, and IL interleukin.
